# Supplementary material for: Predicting Peri-Operative Outcomes in Patients Treated with Percutaneous Thermal Ablation for Small Renal Masses: The SuNS Nephrometry Score
Source: MDPI journal article supplement (doi:10.3390/diagnostics13182955), 2023-09-15
Supplement: s1 [file s1]

**Supplementary Table S3.** Descriptive characteristics of 418 patients diagnosed with small renal masses between 2008 and 2021 and treated with ablation. Stratification is made according to SuNS score complexity class (low vs moderate vs high). Data are shown as medians for continuous variables or as counts and percentages (%) for categorical variables.

| Renal cell carcinoma treated with ablation              | Overall<br>n = 418 | Low<br>n = 256 (61%) | Moderate<br>n = 128 (31%) | High<br>n = 34 (8%) | p-value          |
|---------------------------------------------------------|--------------------|----------------------|---------------------------|---------------------|------------------|
| Age at diagnosis (years)<br>Median (IQR)                | 67 (59-76)         | 67 (59-74)           | 69 (62-78)                | 70 (63-80)          | <b>0.04</b>      |
| Sex                                                     |                    |                      |                           |                     | 0.12             |
| Male                                                    | 277 (66%)          | 179 (70%)            | 76 (59%)                  | 22 (65%)            |                  |
| Age-adjusted Charlson Comorbidity Index<br>Median (IQR) | 5.00 (4.00-6.00)   | 5.00 (4.00-6.00)     | 5.00 (4.00-6.25)          | 5.50 (4.00-7.75)    | 0.2              |
| Body mass index<br>Median (IQR)                         | 26.0 (24.0-29.0)   | 25.6 (23.6-28.0)     | 26.9 (24.4-29.4)          | 27.3 (25.0-28.0)    | <b>0.01</b>      |
| Side                                                    |                    |                      |                           |                     | 0.5              |
| Left                                                    | 180 (43%)          | 104 (41%)            | 60 (47%)                  | 16 (47%)            |                  |
| Right                                                   | 210 (50%)          | 137 (54%)            | 57 (45%)                  | 16 (47%)            |                  |
| Bilateral                                               | 28 (7%)            | 15 (5%)              | 11 (8%)                   | 2 (6%)              |                  |
| Face                                                    |                    |                      |                           |                     | 0.3              |
| Posterior                                               | 215 (51%)          | 133 (52%)            | 69 (54%)                  | 13 (38%)            |                  |
| Anterior                                                | 203 (49%)          | 123 (48%)            | 59 (46%)                  | 21 (62%)            |                  |
| Renal rim                                               |                    |                      |                           |                     | <b>0.008</b>     |
| Lateral                                                 | 255 (61%)          | 171 (67%)            | 68 (53%)                  | 16 (47%)            |                  |
| Medial                                                  | 163 (39%)          | 85 (33%)             | 60 (47%)                  | 18 (53%)            |                  |
| Polar location                                          |                    |                      |                           |                     | 0.05             |
| Upper                                                   | 115 (28%)          | 71 (28%)             | 34 (27%)                  | 10 (29%)            |                  |
| Middle                                                  | 169 (40%)          | 94 (37%)             | 55 (43%)                  | 20 (59%)            |                  |
| Lower                                                   | 134 (32%)          | 91 (36%)             | 39 (30%)                  | 4 (12%)             |                  |
| cT stage                                                |                    |                      |                           |                     | <b>&lt;0.001</b> |
| T1a                                                     | 370 (89%)          | 256 (100%)           | 95 (74%)                  | 19 (56%)            |                  |
| T1b                                                     | 48 (11%)           | 0 (0%)               | 33 (26%)                  | 15 (44%)            |                  |
| Size (diameter)                                         |                    |                      |                           |                     | <b>&lt;0.001</b> |
| ≤3 cm                                                   | 289 (69%)          | 238 (93%)            | 51 (40%)                  | 0 (0%)              |                  |
| >3 ≤4 cm                                                | 81 (19%)           | 18 (7%)              | 44 (34%)                  | 19 (56%)            |                  |
| >4 cm                                                   | 48 (11%)           | 0 (0%)               | 33 (26%)                  | 15 (44%)            |                  |
| Contact surface area                                    |                    |                      |                           |                     | <b>&lt;0.001</b> |
| <10 cm <sup>2</sup>                                     | 218 (52%)          | 194 (76%)            | 24 (19%)                  | 0 (0%)              |                  |
| ≥10 cm <sup>2</sup>                                     | 200 (48%)          | 62 (24%)             | 104 (81%)                 | 34 (100%)           |                  |
| Nearness to renal sinus or collecting system            |                    |                      |                           |                     | <b>&lt;0.001</b> |
| >4 mm                                                   | 331 (79%)          | 256 (100%)           | 75 (59%)                  | 0 (0%)              |                  |
| ≤4 mm                                                   | 87 (21%)           | 0 (0%)               | 53 (41%)                  | 34 (100%)           |                  |
| Nearness to ureter (mm)<br>Median (IQR)                 | 53 (40-66)         | 56 (43-67)           | 51 (38-65)                | 43 (35-58)          | <b>0.009</b>     |
| Nearness to bowel (mm)<br>Median (IQR)                  | 49 (32-69)         | 46 (30, 67)          | 53 (34, 73)               | 49 (35-63)          | 0.3              |
| Skin-to-tumour distance                                 |                    |                      |                           |                     | 0.2              |
| ≤10 cm                                                  | 299 (72%)          | 191 (75%)            | 86 (67%)                  | 22 (65%)            |                  |
| >10 cm                                                  | 119 (28%)          | 65 (25%)             | 42 (33%)                  | 12 (35%)            |                  |
| Histology                                               |                    |                      |                           |                     | 0.06             |
| Clear cell                                              | 240 (62%)          | 135 (57%)            | 80 (68%)                  | 25 (80%)            |                  |
| Non-clear cell                                          | 97 (25%)           | 69 (29%)             | 25 (21%)                  | 3 (10%)             |                  |
| Benign                                                  | 48 (12%)           | 32 (14%)             | 13 (11%)                  | 3 (10%)             |                  |
| Technique                                               |                    |                      |                           |                     | <b>0.04</b>      |
| Microwave                                               | 268 (64%)          | 175 (68%)            | 76 (59%)                  | 17 (50%)            |                  |
| Radiofrequency                                          | 150 (36%)          | 81 (32%)             | 52 (41%)                  | 17 (50%)            |                  |
| Ablation                                                |                    |                      |                           |                     | <b>&lt;0.001</b> |
| Complete                                                | 376 (90%)          | 249 (97%)            | 111 (87%)                 | 16 (47%)            |                  |
| Partial                                                 | 42 (10%)           | 7 (3%)               | 17 (13%)                  | 18 (53%)            |                  |
| Clavien-Dindo class                                     |                    |                      |                           |                     | <b>0.002</b>     |
| <3                                                      | 394 (94%)          | 249 (97%)            | 116 (91%)                 | 29 (85%)            |                  |
| ≥3                                                      | 24 (6%)            | 7 (3%)               | 12 (9%)                   | 5 (15%)             |                  |
| Glomerular filtration rate decrease                     |                    |                      |                           |                     | 0.2              |
| <30%                                                    | 385 (92%)          | 240 (94%)            | 115 (90%)                 | 30 (88%)            |                  |
| ≥30%                                                    | 33 (8%)            | 16 (6%)              | 13 (10%)                  | 4 (12%)             |                  |
| Reason for trifecta not achieved                        |                    |                      |                           |                     | <b>&lt;0.001</b> |
| Trifecta achieved                                       | 329 (79%)          | 227 (89%)            | 90 (70%)                  | 12 (35%)            |                  |
| Partial ablation                                        | 34 (8%)            | 6 (2%)               | 15 (12%)                  | 13 (38%)            |                  |
| Glomerular filtration rate decrease ≥30%                | 28 (7%)            | 6 (2%)               | 9 (7%)                    | 2 (6%)              |                  |
| Clavien-Dindo class ≥3                                  | 17 (4%)            | 16 (6%)              | 10 (8%)                   | 2 (6%)              |                  |
| Two or more factors                                     | 10 (2%)            | 1 (1%)               | 4 (3%)                    | 5 (15%)             |                  |

Bold values indicate statistical significance p<0.05.

SuNS: Su(rface), N(earness to renal sinus or collecting system), S(ize); IQR: interquartile range.
