# Supplementary material for: Predicting Peri-Operative Outcomes in Patients Treated with Percutaneous Thermal Ablation for Small Renal Masses: The SuNS Nephrometry Score
Source: MDPI journal article supplement (doi:10.3390/diagnostics13182955), 2023-09-15
Supplement: s1 [file s1]

**Supplementary Table S2** Rates of trifecta achieved and univariable logistic regression predicting trifecta status (trifecta achieved vs trifecta not achieved) according to SuNS score and derived complexity classes.

| SuNS score | Rate of trifecta achieved | Odds ratio | p-value          | Complexity classes | Odds ratio | p-value          |
|------------|---------------------------|------------|------------------|--------------------|------------|------------------|
| <b>3</b>   | 91%                       | Ref        |                  | <b>Low</b>         | Ref        |                  |
| <b>4</b>   | 84%                       | 1.9        | 0.1              |                    |            |                  |
| <b>5</b>   | 77%                       | 3.1        | <b>0.005</b>     | <b>Moderate</b>    | 3.3        | <b>&lt;0.001</b> |
| <b>6</b>   | 64%                       | 5.6        | <b>&lt;0.001</b> |                    |            |                  |
| <b>7</b>   | 47%                       | 11.1       | <b>&lt;0.001</b> | <b>High</b>        | 14.3       | <b>&lt;0.001</b> |
| <b>8</b>   | 20%                       | 40.0       | <b>&lt;0.001</b> |                    |            |                  |

Bold values indicate statistical significance  $p < 0.05$ .

SuNS: Su(rface), N(earness to renal sinus or collecting system), S(ize); CI: confidence interval.
