# Supplementary material for: Predicting Peri-Operative Outcomes in Patients Treated with Percutaneous Thermal Ablation for Small Renal Masses: The SuNS Nephrometry Score
Source: MDPI journal article supplement (doi:10.3390/diagnostics13182955), 2023-09-15
Supplement: s1 [file s1]

**Supplementary Table S1.** Separate univariable logistic regression models predicting trifecta status (trifecta achieved vs trifecta not achieved) in patients diagnosed with small renal masses between 2008 and 2021 and treated with ablation. C-index represents the discrimination ability of the variable.

| Variables tested                                    | Odds ratio | 95% CI     | p-value          | C-index |
|-----------------------------------------------------|------------|------------|------------------|---------|
| <b>Side</b>                                         |            |            |                  | 0.53    |
| Left                                                | Ref        |            |                  |         |
| Right                                               | 1.3        | (0.8-2.1)  | 0.3              |         |
| Bilateral                                           | 0.9        | (0.3-2.4)  | 0.8              |         |
| <b>Face</b>                                         |            |            |                  | 0.53    |
| Posterior                                           | Ref        |            |                  |         |
| Anterior                                            | 0.8        | (0.5-1.2)  | 0.3              |         |
| <b>Renal rim</b>                                    |            |            |                  | 0.54    |
| Lateral                                             | Ref        |            |                  |         |
| Medial                                              | 1.4        | (0.9-2.3)  | 0.1              |         |
| <b>Polar location</b>                               |            |            |                  | 0.55    |
| Upper                                               | Ref        |            |                  |         |
| Middle                                              | 0.7        | (0.4-1.3)  | 0.3              |         |
| Lower                                               | 0.6        | (0.3-1.1)  | 0.1              |         |
| <b>Size (diameter)</b>                              |            |            |                  | 0.66    |
| ≤3 cm                                               | Ref        |            |                  |         |
| >3 ≤4 cm                                            | 2.7        | (1.5-4.8)  | <b>&lt;0.001</b> |         |
| >4 cm                                               | 5.6        | (2.9-10.8) | <b>&lt;0.001</b> |         |
| <b>Contact surface area</b>                         |            |            |                  | 0.66    |
| <10 cm <sup>2</sup>                                 | Ref        |            |                  |         |
| ≥10 cm <sup>2</sup>                                 | 3.9        | (2.3-6.6)  | <b>&lt;0.001</b> |         |
| <b>Nearness to renal sinus or collecting system</b> |            |            |                  | 0.64    |
| >4 mm                                               | Ref        |            |                  |         |
| ≤4 mm                                               | 4.3        | (2.5-7.2)  | <b>&lt;0.001</b> |         |
| <b>Nearness to ureter</b>                           |            |            |                  | 0.58    |
| >6 cm                                               | Ref        |            |                  |         |
| 4.5-6 cm                                            | 1.4        | (0.7-2.9)  | 0.3              |         |
| <4.5 cm                                             | 2.2        | (1.2-4.3)  | <b>0.02</b>      |         |
| <b>Nearness to bowel</b>                            |            |            |                  | 0.51    |
| >6 cm                                               | Ref        |            |                  |         |
| 4-6 cm                                              | 1.03       | (0.6-1.9)  | 0.9              |         |
| <4 cm                                               | 0.9        | (0.5-1.6)  | 0.7              |         |
| <b>Skin-to-tumour distance</b>                      |            |            |                  | 0.53    |
| ≤10 cm                                              | Ref        |            |                  |         |
| >10 cm                                              | 1.3        | (0.8-2.1)  | 0.3              |         |
| <b>Histology</b>                                    |            |            |                  | 0.56    |
| Clear cell                                          | Ref        |            |                  |         |
| Non-clear cell                                      | 0.6        | (0.3-1.2)  | 0.2              |         |
| Benign                                              | 1.4        | (0.7-2.8)  | 0.3              |         |

Bold values indicate statistical significance p<0.05.

CI: confidence interval.
