# Supplementary material for: Predicting Peri-Operative Outcomes in Patients Treated with Percutaneous Thermal Ablation for Small Renal Masses: The SuNS Nephrometry Score
Source: MDPI journal article supplement (doi:10.3390/diagnostics13182955), 2023-09-15
Supplement: s1 [file s1]

**Supplementary Table S4.** Comparison of patients distribution according to complexity class between PADUA, RENAL and SuNS scores.

| Complexity classes | SuNS low complexity<br>n = 256 (61%) |           | SuNS moderate complexity<br>n = 128 (31%) |          | SuNS high complexity<br>n = 34 (8%) |          |
|--------------------|--------------------------------------|-----------|-------------------------------------------|----------|-------------------------------------|----------|
|                    | PADUA                                | RENAL     | PADUA                                     | RENAL    | PADUA                               | RENAL    |
| Low                | 155 (60%)                            | 214 (84%) | 38 (30%)                                  | 52 (41%) | 0 (0%)                              | 2 (6%)   |
| Moderate           | 84 (33%)                             | 42 (16%)  | 38 (30%)                                  | 58 (45%) | 14 (41%)                            | 23 (68%) |
| High               | 17 (7%)                              | 0 (0%)    | 52 (40%)                                  | 18 (14%) | 20 (59%)                            | 9 (26%)  |

SuNS: Su(rface), N(earness to renal sinus or collecting system), S(ize)
