# Supplementary material for: Predicting Peri-Operative Outcomes in Patients Treated with Percutaneous Thermal Ablation for Small Renal Masses: The SuNS Nephrometry Score
Source: Diagnostics (Basel). 2023 Sep 15;13(18):2955. doi: 10.3390/diagnostics13182955 (PMC10528095; doi:10.3390/diagnostics13182955)
Supplement: Supplementary file 1 [file diagnostics-13-02955-s001.zip]

Archive with 5 entries (5 files):
- Supplementary figure 1.tiff
- Supplementary table S1.pdf
- Supplementary table S2.pdf
- Supplementary table S3.pdf
- Supplementary table S4.pdf
